# Supplementary material for: Early-life stress elicits peripheral and brain immune activation differently in wild type and 5xFAD mice in a sex-specific manner
Source: Springer Nature journal article supplement (doi:10.1186/s12974-022-02515-w), 2022-06-15

**A**

# Lymphoid gating strategy

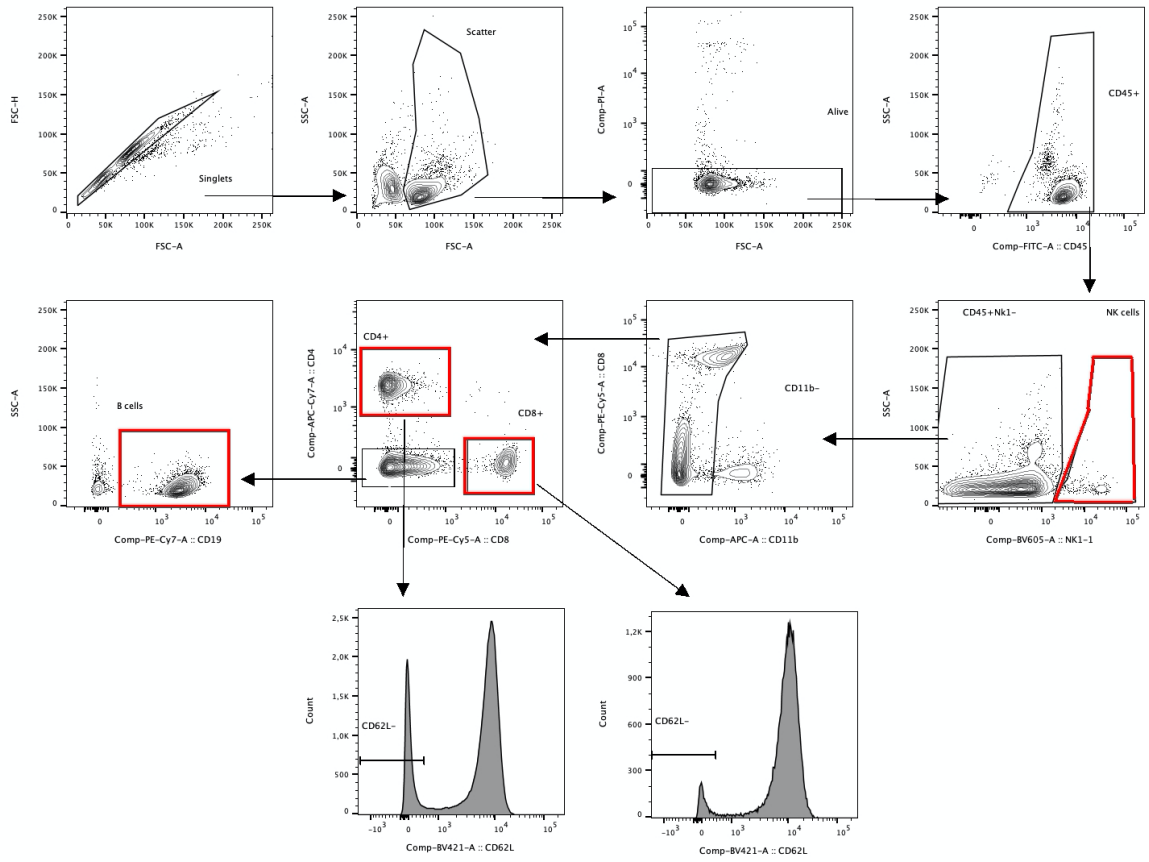**B**

# Myeloid gating strategy

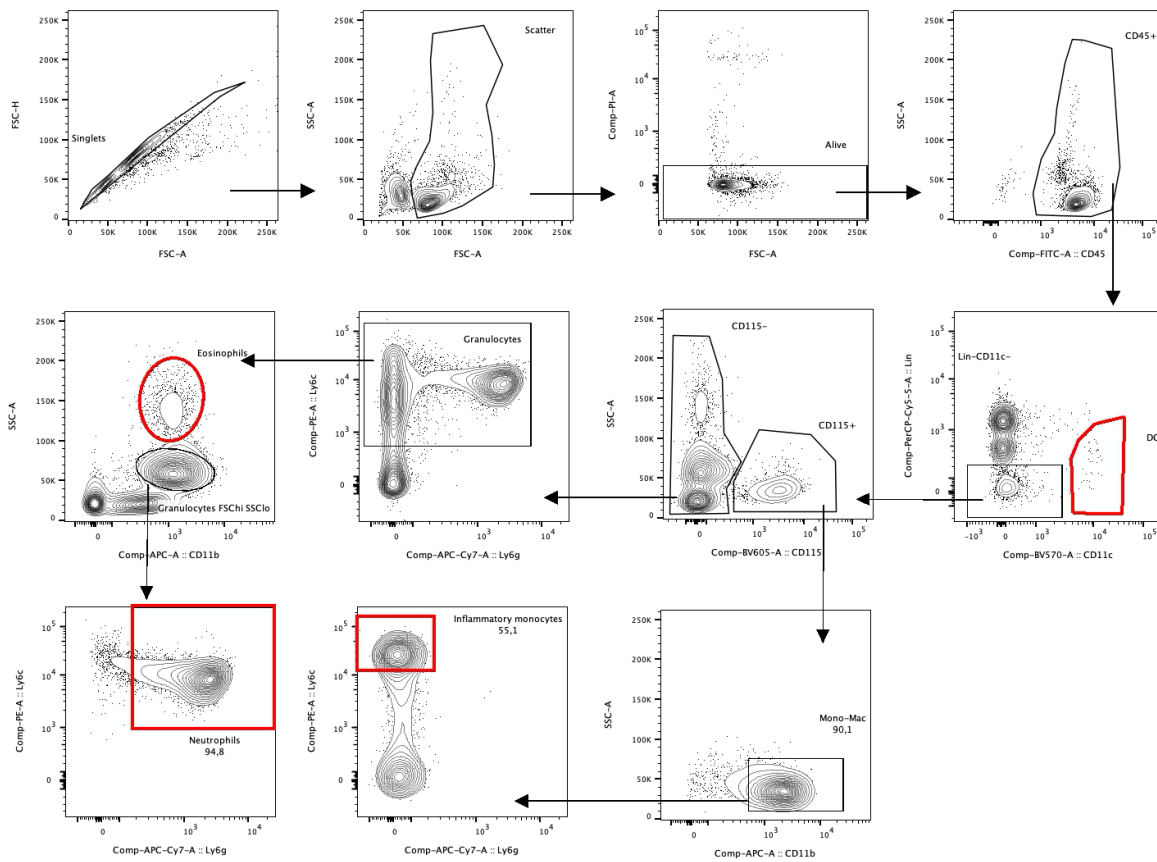

Supplement: MOESM2 [file 23165290]
