# Supplementary material for: Early-life stress elicits peripheral and brain immune activation differently in wild type and 5xFAD mice in a sex-specific manner
Source: Springer Nature journal article supplement (doi:10.1186/s12974-022-02515-w), 2022-06-15
Supplement: MOESM3 [file 23165290]

1 **Supplementary Table 1:** Statistical analysis for figure 1.

| Experiment                                 | Groups | 2-way ANOVA                                       |                                                 |                                              | Tukey's multiple comparisons test |                            |
|--------------------------------------------|--------|---------------------------------------------------|-------------------------------------------------|----------------------------------------------|-----------------------------------|----------------------------|
|                                            |        | Factor                                            | F (DFn, DFd)                                    | P Value                                      | Comparisons                       | P Value                    |
| PD15: Iba1+ area (%) Hippocampus           | WT     | Interaction<br>Sex<br>MS                          | F(1,13)=2.41<br>F(1,13)=16.4<br>F(1,13)=13.0    | 0.1445<br><b>0.0014**</b><br><b>0.0032**</b> | Non-MS F vs. MS F                 | 0.5103                     |
|                                            |        |                                                   |                                                 |                                              | Non-MS M vs. MS M                 | <b>0.0113*</b>             |
|                                            |        |                                                   |                                                 |                                              | Non-MS F vs. Non-MS M             | 0.3093                     |
|                                            |        |                                                   |                                                 |                                              | MS F vs. MS M                     | <b>0.0093**</b>            |
|                                            | 5xFAD  | Interaction<br>Sex<br>MS                          | F(1,13)=0.527<br>F(1,13)=0.577<br>F(1,13)=1.610 | 0.4806<br>0.4610<br>0.2272                   | Non-MS F vs. MS F                 | 0.9815                     |
|                                            |        |                                                   |                                                 |                                              | Non-MS M vs. MS M                 | 0.4937                     |
|                                            |        |                                                   |                                                 |                                              | Non-MS F vs. Non-MS M             | 0.7388                     |
|                                            |        |                                                   |                                                 |                                              | MS F vs. MS M                     | >0.999                     |
| PD15: Iba1+ area (%) Prefrontal Cortex     | WT     | Interaction<br>Sex<br>MS                          | F(1,16)=1.59<br>F(1,16)=2.40<br>F(1,16)=0.548   | 0.2254<br>0.1411<br>0.4699                   | Non-MS F vs. MS F                 | 0.9823                     |
|                                            |        |                                                   |                                                 |                                              | Non-MS M vs. MS M                 | 0.5085                     |
|                                            |        |                                                   |                                                 |                                              | Non-MS F vs. Non-MS M             | 0.9969                     |
|                                            |        |                                                   |                                                 |                                              | MS F vs. MS M                     | 0.2337                     |
|                                            | 5xFAD  | Interaction<br>Sex<br>MS                          | F(1,16)=0.420<br>F(1,16)=2.750<br>F(1,16)=0.014 | 0.5261<br>0.1169<br>0.9055                   | Non-MS F vs. MS F                 | 0.9469                     |
|                                            |        |                                                   |                                                 |                                              | Non-MS M vs. MS M                 | 0.9817                     |
|                                            |        |                                                   |                                                 |                                              | Non-MS F vs. Non-MS M             | 0.8903                     |
|                                            |        |                                                   |                                                 |                                              | MS F vs. MS M                     | 0.3906                     |
| PD15: Microglia morphology (%) Hippocampus | WT     | Ramified<br>With stout processes<br>Round/ameboid |                                                 |                                              | Non-MS F vs. MS F                 | 0.9380<br>0.9969<br>0.8614 |
|                                            |        |                                                   |                                                 |                                              | Non-MS M vs. MS M                 | 0.9999<br>0.9299<br>0.9072 |
|                                            |        |                                                   |                                                 |                                              | Non-MS F vs. Non-MS M             | 0.9529<br>0.9906<br>0.8435 |
|                                            |        |                                                   |                                                 |                                              | MS F vs. MS M                     | >0.9999<br>0.9143          |

|                                                                             |              |                                                   |                                                      |                                     |  |                             |                                              |                            |
|-----------------------------------------------------------------------------|--------------|---------------------------------------------------|------------------------------------------------------|-------------------------------------|--|-----------------------------|----------------------------------------------|----------------------------|
|                                                                             |              |                                                   |                                                      |                                     |  | 0.9072                      |                                              |                            |
|                                                                             | <b>5xFAD</b> | Ramified<br>With stout processes<br>Round/ameboid |                                                      |                                     |  | Non-MS F<br>vs. MS F        | 0.9907<br>0.9828<br>0.9999                   |                            |
| Non-MS M<br>vs. MS M                                                        |              |                                                   |                                                      |                                     |  | 0.9936<br>0.7848<br>0.9057  |                                              |                            |
| Non-MS F<br>vs. Non-MS<br>M                                                 |              |                                                   |                                                      |                                     |  | 0.9874<br>0.9914<br>>0.9999 |                                              |                            |
| MS F vs. MS<br>M                                                            |              |                                                   |                                                      |                                     |  | 0.9780<br>0.9947<br>0.9163  |                                              |                            |
| <b>PD15:<br/>Microglia<br/>morphology<br/>(%)<br/>Prefrontal<br/>Cortex</b> | <b>WT</b>    | Ramified<br>With stout processes<br>Round/ameboid |                                                      |                                     |  | Non-MS F<br>vs. MS F        | 0.9884<br><b>0.0055**</b><br><b>0.0021**</b> |                            |
|                                                                             |              |                                                   |                                                      |                                     |  | Non-MS M<br>vs. MS M        | 0.7510<br>0.9800<br>0.5141                   |                            |
|                                                                             |              |                                                   |                                                      |                                     |  | Non-MS F<br>vs. Non-MS<br>M | 0.9780<br>0.0692<br>0.1611                   |                            |
|                                                                             |              |                                                   |                                                      |                                     |  | MS F vs. MS<br>M            | 0.3246<br>0.5285<br><b>0.0173*</b>           |                            |
|                                                                             | <b>5xFAD</b> | Ramified<br>With stout processes<br>Round/ameboid |                                                      |                                     |  |                             | Non-MS F<br>vs. MS F                         | 0.9941<br>0.6262<br>0.7777 |
|                                                                             |              |                                                   |                                                      |                                     |  |                             | Non-MS M<br>vs. MS M                         | 0.2831<br>0.9678<br>0.5373 |
|                                                                             |              |                                                   |                                                      |                                     |  |                             | Non-MS F<br>vs. Non-MS<br>M                  | 0.4133<br>0.6007<br>0.9897 |
|                                                                             |              |                                                   |                                                      |                                     |  |                             | MS F vs. MS<br>M                             | 0.9573<br>0.9753<br>0.9997 |
| <b>PD15:<br/>CXCL1<br/>Hippocampus</b>                                      | <b>WT</b>    | Interaction<br><b>Sex</b><br>MS                   | F(1,16)=0.134<br><b>F(1,16)=8.93</b><br>F(1,16)=1.44 | 0.7190<br><b>0.0087**</b><br>0.2471 |  | Non-MS F<br>vs. MS F        | 0.6897                                       |                            |
|                                                                             |              |                                                   |                                                      |                                     |  | Non-MS M<br>vs. MS M        | 0.9335                                       |                            |
|                                                                             |              |                                                   |                                                      |                                     |  | Non-MS F<br>vs. Non-MS<br>M | 0.1231                                       |                            |
|                                                                             |              |                                                   |                                                      |                                     |  | MS F vs. MS<br>M            | 0.2856                                       |                            |
|                                                                             | <b>5xFAD</b> | Interaction<br><b>Sex</b><br>MS                   | F(1,15)=1.12<br>F(1,15)=0.441<br>F(1,15)=0.0379      | 0.3048<br>0.5161<br>0.8481          |  |                             | Non-MS F<br>vs. MS F                         | 0.8114                     |
|                                                                             |              |                                                   |                                                      |                                     |  |                             | Non-MS M<br>vs. MS M                         | 0.9268                     |
|                                                                             |              |                                                   |                                                      |                                     |  |                             | Non-MS F<br>vs. Non-MS<br>M                  | 0.9920                     |

|                                                      |              |                                 |                                                           |                                    |                       |        |
|------------------------------------------------------|--------------|---------------------------------|-----------------------------------------------------------|------------------------------------|-----------------------|--------|
|                                                      |              |                                 |                                                           |                                    | MS F vs. MS M         | 0.6241 |
| <b>PD15: TNF-<math>\alpha</math><br/>Hippocampus</b> | <b>WT</b>    | Interaction<br><b>Sex</b><br>MS | F(1,16)=0.00114<br><b>F(1,16)=7.36</b><br>F(1,16)=0.00666 | 0.9735<br><b>0.0154*</b><br>0.9360 | Non-MS F vs. MS F     | >0.999 |
|                                                      |              |                                 |                                                           |                                    | Non-MS M vs. MS M     | 0.9998 |
|                                                      |              |                                 |                                                           |                                    | Non-MS F vs. Non-MS M | 0.2502 |
|                                                      |              |                                 |                                                           |                                    | MS F vs. MS M         | 0.2690 |
|                                                      | <b>5xFAD</b> | Interaction<br><b>Sex</b><br>MS | <b>F(1,16)=4.54</b><br>F(1,16)=0.374<br>F(1,16)=0.033     | <b>0.0489*</b><br>0.5494<br>0.8581 | Non-MS F vs. MS F     | 0.3876 |
|                                                      |              |                                 |                                                           |                                    | Non-MS M vs. MS M     | 0.5294 |
|                                                      |              |                                 |                                                           |                                    | Non-MS F vs. Non-MS M | 0.2511 |
|                                                      |              |                                 |                                                           |                                    | MS F vs. MS M         | 0.7091 |

2

3

4 **Supplementary Table 2:** Statistical analysis for figure 2.

| Experiment                                                    | Groups | 2-way ANOVA |                |                  | Tukey's multiple comparisons test |                |
|---------------------------------------------------------------|--------|-------------|----------------|------------------|-----------------------------------|----------------|
|                                                               |        | Factor      | F (DFn, DFd)   | P Value          | Comparisons                       | P Value        |
| 4 months:<br>Open Field<br>Test                               | WT     | Interaction | F(1,26)=0.0434 | 0.8366           | Non-MS F vs. MS F                 | 0.6126         |
|                                                               |        | Sex         | F(1,26)=4.080  | 0.0537           | Non-MS M vs. MS M                 | 0.7368         |
|                                                               |        | MS          | F(1,26)=2.560  | 0.1216           | Non-MS F vs. Non-MS M             | 0.3746         |
|                                                               |        |             |                |                  | MS F vs. MS M                     | 0.6110         |
|                                                               | 5xFAD  | Interaction | F(1,37)=4.890  | <b>0.0332*</b>   | Non-MS F vs. MS F                 | 0.3750         |
|                                                               |        | Sex         | F(1,37)=0.453  | 0.5053           | Non-MS M vs. MS M                 | 0.4504         |
|                                                               |        | MS          | F(1,37)=0.0386 | 0.8453           | Non-MS F vs. Non-MS M             | 0.1121         |
|                                                               |        |             |                |                  | MS F vs. MS M                     | 0.7601         |
| 4 months:<br>Forced<br>Swim Test                              | WT     | Interaction | F(1,24)=0.586  | 0.4513           | Non-MS F vs. MS F                 | 0.0707         |
|                                                               |        | Sex         | F(1,24)=1.920  | 0.1781           | <b>Non-MS M vs. MS M</b>          | <b>0.003**</b> |
|                                                               |        | MS          | F(1,24)=20.80  | <b>0.0001***</b> | Non-MS F vs. Non-MS M             | 0.4358         |
|                                                               |        |             |                |                  | MS F vs. MS M                     | 0.9714         |
|                                                               | 5xFAD  | Interaction | F(1,36)=1.40   | 0.244            | <b>Non-MS F vs. MS F</b>          | <b>0.0269*</b> |
|                                                               |        | Sex         | F(1,36)=0.168  | 0.6845           | Non-MS M vs. MS M                 | 0.3792         |
|                                                               |        | MS          | F(1,36)=10.9   | <b>0.0022**</b>  | Non-MS F vs. Non-MS M             | 0.6567         |
|                                                               |        |             |                |                  | MS F vs. MS M                     | 0.9502         |
| 4 months:<br>Novel<br>Object<br>Recognition<br>Memory<br>Test | WT     | Interaction | F(1,19)=0.0014 | 0.9698           | <b>Non-MS F vs. MS F</b>          | <b>0.0390*</b> |
|                                                               |        | Sex         | F(1,19)=0.213  | 0.6498           | <b>Non-MS M vs. MS M</b>          | <b>0.0426*</b> |
|                                                               |        | MS          | F(1,19)=17.00  | <b>0.0006***</b> | Non-MS F vs. Non-MS M             | 0.9899         |
|                                                               |        |             |                |                  | MS F vs. MS M                     | 0.9851         |
|                                                               | 5xFAD  | Interaction | F(1,22)=0.0901 | 0.7668           | <b>Non-MS F vs. MS F</b>          | <b>0.0400*</b> |
|                                                               |        | Sex         | F(1,22)=7.06   | <b>0.0144*</b>   | Non-MS M vs. MS M                 | 0.0572         |
|                                                               |        | MS          | F(1,22)=15.7   | <b>0.0007***</b> | Non-MS F vs. Non-MS M             | 0.1563         |
|                                                               |        |             |                |                  | MS F vs. MS M                     | 0.4015         |
| 4 months:<br>HP gene<br>expression<br><i>Bdnf</i>             | WT     | Interaction | F(1,18)=1.68   | 0.2109           | Non-MS F vs. MS F                 | 0.4331         |
|                                                               |        | Sex         | F(1,18)=1.77   | 0.1998           | <b>Non-MS M vs. MS M</b>          | <b>0.0160*</b> |
|                                                               |        | MS          | F(1,18)=12.1   | <b>0.0027**</b>  | Non-MS F vs. Non-MS M             | 0.2799         |
|                                                               |        |             |                |                  | MS F vs. MS M                     | >0.9999        |
|                                                               | 5xFAD  | Interaction | F(1,19)=2.50   | 0.1307           | Non-MS F vs. MS F                 | 0.8942         |
|                                                               |        | Sex         | F(1,19)=0.072  | 0.7913           | <b>Non-MS M vs. MS M</b>          | <b>0.034*</b>  |
|                                                               |        | MS          | F(1,19)=6.72   | <b>0.0179*</b>   | Non-MS F vs. Non-MS M             | 0.5828         |
|                                                               |        |             |                |                  | MS F vs. MS M                     | 0.7823         |
| 4 months:<br>HP gene<br>expression<br><i>Arc</i>              | WT     | Interaction | F(1,18)=1.180  | 0.2918           | Non-MS F vs. MS F                 | 0.6909         |
|                                                               |        | Sex         | F(1,18)=0.0909 | 0.7655           | Non-MS M vs. MS M                 | 0.9724         |
|                                                               |        | MS          | F(1,18)=0.228  | 0.6391           | Non-MS F vs. Non-MS M             | 0.7618         |
|                                                               |        |             |                |                  | MS F vs. MS M                     | 0.9440         |
|                                                               | 5xFAD  | Interaction | F(1,22)=16.6   | <b>0.0005***</b> | Non-MS F vs. MS F                 | 0.0842         |
|                                                               |        | Sex         | F(1,22)=0.0931 | 0.7632           | <b>Non-MS M vs. MS M</b>          | <b>0.0185*</b> |
|                                                               |        | MS          | F(1,22)=0.254  | 0.6194           | <b>Non-MS F vs. Non-MS M</b>      | <b>0.0253*</b> |
|                                                               |        |             |                |                  |                                   |                |

|  |  |  |  |  |               |        |
|--|--|--|--|--|---------------|--------|
|  |  |  |  |  | MS F vs. MS M | 0.0634 |
|--|--|--|--|--|---------------|--------|

5

6

7 **Supplementary Table 3:** Statistical analysis for figure 3.

8

| Experiment                                                                         | Groups | 2-way ANOVA              |               |                 | Tukey's multiple comparisons test |                |
|------------------------------------------------------------------------------------|--------|--------------------------|---------------|-----------------|-----------------------------------|----------------|
|                                                                                    |        | Factor                   | F (DFn, DFd)  | P Value         | Comparisons                       | P Value        |
| 4 months:<br>Iba1+ area<br>(%)<br>Prefrontal<br>Cortex                             | WT     | Interaction<br>Sex<br>MS | F(1,21)=0.898 | 0.3451          | Non-MS F vs. MS F                 | 0.4640         |
|                                                                                    |        |                          | F(1,21)=1.26  | 0.2749          | <b>Non-MS M vs. MS M</b>          | <b>0.0365*</b> |
|                                                                                    |        |                          | F(1,21)=9.61  | <b>0.0054**</b> | Non-MS F vs. Non-MS M             | 0.9994         |
|                                                                                    |        |                          |               |                 | MS F vs. MS M                     | 0.4542         |
|                                                                                    | 5xFAD  | Interaction<br>Sex<br>MS | F(1,22)=5.49  | <b>0.0286*</b>  | Non-MS F vs. MS F                 | 0.0829         |
|                                                                                    |        |                          | F(1,22)=4.77  | <b>0.0400*</b>  | Non-MS M vs. MS M                 | 0.8893         |
|                                                                                    |        |                          | F(1,22)=1.87  | 0.1850          | Non-MS F vs. Non-MS M             | 0.9995         |
|                                                                                    |        |                          |               |                 | <b>MS F vs. MS M</b>              | <b>0.020*</b>  |
| 4 months:<br>CD68+ area<br>related to<br>Iba1+ area<br>(%)<br>Prefrontal<br>Cortex | WT     | Interaction<br>Sex<br>MS | F(1,15)=0.126 | 0.7278          | Non-MS F vs. MS F                 | 0.6945         |
|                                                                                    |        |                          | F(1,15)=0.763 | 0.3961          | Non-MS M vs. MS M                 | 0.4478         |
|                                                                                    |        |                          | F(1,15)=3.48  | 0.0819          | Non-MS F vs. Non-MS M             | 0.8074         |
|                                                                                    |        |                          |               |                 | MS F vs. MS M                     | 0.9838         |
|                                                                                    | 5xFAD  | Interaction<br>Sex<br>MS | F(1,16)=4.07  | 0.0606          | Non-MS F vs. MS F                 | 0.9183         |
|                                                                                    |        |                          | F(1,16)=4.56  | <b>0.0485*</b>  | Non-MS M vs. MS M                 | 0.1608         |
|                                                                                    |        |                          | F(1,16)=1.25  | 0.2806          | Non-MS F vs. Non-MS M             | 0.9998         |
|                                                                                    |        |                          |               |                 | MS F vs. MS M                     | <b>0.0431*</b> |
| 4 months:<br>6E10+ area<br>(%)<br>Prefrontal<br>Cortex                             | 5xFAD  | Interaction<br>Sex<br>MS | F(1,23)=0.619 | 0.4396          | Non-MS F vs. MS F                 | 0.3647         |
|                                                                                    |        |                          | F(1,23)=0.246 | 0.6246          | Non-MS M vs. MS M                 | 0.9044         |
|                                                                                    |        |                          | F(1,23)=2.86  | 0.1043          | Non-MS F vs. Non-MS M             | 0.8082         |
|                                                                                    |        |                          |               |                 | MS F vs. MS M                     | 0.9967         |
| 4 months:<br>Gal-3+ area<br>(%)<br>Prefrontal<br>Cortex                            | 5xFAD  | Interaction<br>Sex<br>MS | F(1,11)=2.76  | 0.1251          | Non-MS F vs. MS F                 | 0.1313         |
|                                                                                    |        |                          | F(1,11)=3.57  | 0.0853          | Non-MS M vs. MS M                 | 0.9875         |
|                                                                                    |        |                          | F(1,11)=4.30  | 0.0625          | Non-MS F vs. Non-MS M             | 0.9985         |
|                                                                                    |        |                          |               |                 | MS F vs. MS M                     | 0.1029         |
| 4 months:<br>Congo Red<br>Prefrontal<br>Cortex                                     | 5xFAD  | Interaction<br>Sex<br>MS | F(1,23)=1.28  | 0.2967          | <b>Non-MS F vs. MS F</b>          | <b>0.0276*</b> |
|                                                                                    |        |                          | F(1,23)=5.11  | <b>0.0336*</b>  | Non-MS M vs. MS M                 | 0.4032         |
|                                                                                    |        |                          | F(1,23)=10.9  | <b>0.0031**</b> | Non-MS F vs. Non-MS M             | 0.8289         |
|                                                                                    |        |                          |               |                 | MS F vs. MS M                     | 0.1365         |
| 4 months:<br>Soluble<br>Fraction<br>Prefrontal<br>Cortex                           | 5xFAD  | Interaction<br>Sex<br>MS | F(1,10)=0.964 | 0.3494          | Non-MS F vs. MS F                 | 0.3138         |
|                                                                                    |        |                          | F(1,10)=3.150 | 0.1061          | Non-MS M vs. MS M                 | 0.9690         |
|                                                                                    |        |                          | F(1,10)=2.60  | 0.1380          | Non-MS F vs. Non-MS M             | 0.9411         |
|                                                                                    |        |                          |               |                 | MS F vs. MS M                     | 0.2684         |
| 4 months:<br>Protofibrils<br>Prefrontal<br>Cortex                                  | 5xFAD  | Interaction<br>Sex<br>MS | F(1,16)=1.72  | 0.2080          | Non-MS F vs. MS F                 | 0.0795         |
|                                                                                    |        |                          | F(1,16)=11.9  | <b>0.0033**</b> | Non-MS M vs. MS M                 | 0.8563         |
|                                                                                    |        |                          | F(1,16)=5.87  | <b>0.0276*</b>  | Non-MS F vs. Non-MS M             | 0.4105         |
|                                                                                    |        |                          |               |                 | <b>MS F vs. MS M</b>              | <b>0.0256*</b> |
| 4 months:<br>Dense<br>Plaques<br>Prefrontal<br>Cortex                              | 5xFAD  | Interaction<br>Sex<br>MS | F(1,10)=1.270 | 0.2867          | Non-MS F vs. MS F                 | 0.4491         |
|                                                                                    |        |                          | F(1,10)=0.122 | 0.7343          | Non-MS M vs. MS M                 | 0.9987         |
|                                                                                    |        |                          | F(1,10)=0.804 | 0.3909          | Non-MS F vs. Non-MS M             | 0.9447         |
|                                                                                    |        |                          |               |                 | MS F vs. MS M                     | 0.7296         |

9

10

11 **Supplementary Table 4:** Statistical analysis for figure 4.

| Experiment                         | Groups | 2-way ANOVA              |                                                    |                                              | Tukey's multiple comparisons test |                |
|------------------------------------|--------|--------------------------|----------------------------------------------------|----------------------------------------------|-----------------------------------|----------------|
|                                    |        | Factor                   | F (DFn, DFd)                                       | P Value                                      | Comparisons                       | P Value        |
| 4 months:<br>Inflamm.<br>Monocytes | WT     | Interaction<br>Sex<br>MS | F(1, 32)=0.0145<br>F(1, 32)=0.783<br>F(1, 32)=9.61 | 0.9048<br>0.3827<br><b>0.0040**</b>          | Non-MS F vs. MS F                 | 0.1092         |
|                                    |        |                          |                                                    |                                              | Non-MS M vs. MS M                 | 0.1913         |
|                                    |        |                          |                                                    |                                              | Non-MS F vs. Non-MS M             | 0.8928         |
|                                    |        |                          |                                                    |                                              | MS F vs. MS M                     | 0.9479         |
|                                    | 5xFAD  | Interaction<br>Sex<br>MS | F(1, 28)=2.75<br>F(1, 28)=12.4<br>F(1, 28)=13.2    | 0.1086<br><b>0.0015**</b><br><b>0.0011**</b> | Non-MS F vs. MS F                 | 0.3789         |
|                                    |        |                          |                                                    |                                              | <b>Non-MS M vs. MS M</b>          | <b>0.0123*</b> |
|                                    |        |                          |                                                    |                                              | Non-MS F vs. Non-MS M             | 0.5146         |
|                                    |        |                          |                                                    |                                              | <b>MS F vs. MS M</b>              | <b>0.0085*</b> |
| 4 months:<br>Cytotoxic T<br>Cells  | WT     | Interaction<br>Sex<br>MS | F(1, 32)=2.81<br>F(1, 32)=4.82<br>F(1, 32)=5.70    | 0.1033<br><b>0.0356*</b><br><b>0.0231*</b>   | <b>Non-MS F vs. MS F</b>          | <b>0.0281*</b> |
|                                    |        |                          |                                                    |                                              | Non-MS M vs. MS M                 | 0.9611         |
|                                    |        |                          |                                                    |                                              | <b>Non-MS F vs. Non-MS M</b>      | <b>0.0478*</b> |
|                                    |        |                          |                                                    |                                              | MS F vs. MS M                     | 0.9828         |
|                                    | 5xFAD  | Interaction<br>Sex<br>MS | F(1, 28)=0.0043<br>F(1, 28)=4.90<br>F(1, 28)=14.4  | 0.9478<br><b>0.0353*</b><br><b>0.0007***</b> | <b>Non-MS F vs. MS F</b>          | <b>0.0227*</b> |
|                                    |        |                          |                                                    |                                              | Non-MS M vs. MS M                 | 0.0940         |
|                                    |        |                          |                                                    |                                              | Non-MS F vs. Non-MS M             | 0.3924         |
|                                    |        |                          |                                                    |                                              | MS F vs. MS M                     | 0.4323         |
| 4 months:<br>Dendritic<br>Cells    | WT     | Interaction<br>Sex<br>MS | F(1, 32)=1.10<br>F(1, 32)=2.40<br>F(1, 32)=1.59    | 0.3020<br>0.1312<br>0.2163                   | Non-MS F vs. MS F                 | 0.3498         |
|                                    |        |                          |                                                    |                                              | Non-MS M vs. MS M                 | 0.9989         |
|                                    |        |                          |                                                    |                                              | Non-MS F vs. Non-MS M             | 0.2777         |
|                                    |        |                          |                                                    |                                              | MS F vs. MS M                     | 0.9844         |
|                                    | 5xFAD  | Interaction<br>Sex<br>MS | F(1, 28)=1.76<br>F(1, 28)=2.95<br>F(1, 28)=4.74    | 0.1957<br>0.0971<br><b>0.0381*</b>           | Non-MS F vs. MS F                 | 0.8957         |
|                                    |        |                          |                                                    |                                              | Non-MS M vs. MS M                 | 0.1470         |
|                                    |        |                          |                                                    |                                              | Non-MS F vs. Non-MS M             | 0.9911         |
|                                    |        |                          |                                                    |                                              | MS F vs. MS M                     | 0.1958         |
| 4 months:<br>Eosinophils           | WT     | Interaction<br>Sex<br>MS | F(1, 32)=0.343<br>F(1, 32)=5.04<br>F(1, 32)=5.17   | 0.5625<br><b>0.0317*</b><br><b>0.0298*</b>   | Non-MS F vs. MS F                 | 0.1810         |
|                                    |        |                          |                                                    |                                              | Non-MS M vs. MS M                 | 0.6544         |
|                                    |        |                          |                                                    |                                              | Non-MS F vs. Non-MS M             | 0.6493         |
|                                    |        |                          |                                                    |                                              | MS F vs. MS M                     | 0.2062         |
|                                    | 5xFAD  | Interaction<br>Sex<br>MS | F(1, 28)=0.482<br>F(1, 28)=1.26<br>F(1, 28)=2.71   | 0.4932<br>0.2712<br>0.1107                   | Non-MS F vs. MS F                 | 0.2393         |
|                                    |        |                          |                                                    |                                              | Non-MS M vs. MS M                 | 0.9314         |
|                                    |        |                          |                                                    |                                              | Non-MS F vs. Non-MS M             | 0.9884         |
|                                    |        |                          |                                                    |                                              | MS F vs. MS M                     | 0.6184         |
| 4 months:<br>Neutrophils           | WT     | Interaction<br>Sex<br>MS | F(1, 32)=1.43<br>F(1, 32)=7.66<br>F(1, 32)=0.234   | 0.2407<br><b>0.0093**</b><br>0.6318          | Non-MS F vs. MS F                 | 0.6177         |
|                                    |        |                          |                                                    |                                              | Non-MS M vs. MS M                 | 0.9608         |
|                                    |        |                          |                                                    |                                              | <b>Non-MS F vs. Non-MS M</b>      | <b>0.0413*</b> |
|                                    |        |                          |                                                    |                                              | MS F vs. MS M                     | 0.6831         |
|                                    | 5xFAD  | Interaction<br>Sex<br>MS | F(1, 28)=0.980<br>F(1, 28)=7.14<br>F(1, 28)=5.59   | 0.3308<br><b>0.0124*</b><br><b>0.0253*</b>   | Non-MS F vs. MS F                 | 0.6735         |
|                                    |        |                          |                                                    |                                              | Non-MS M vs. MS M                 | 0.1747         |
|                                    |        |                          |                                                    |                                              | Non-MS F vs. Non-MS M             | 0.5962         |

|                                                |              |                          |                                                   |                              |                          |                |
|------------------------------------------------|--------------|--------------------------|---------------------------------------------------|------------------------------|--------------------------|----------------|
|                                                |              |                          |                                                   |                              | MS F vs. MS M            | 0.0882         |
| <b>4 months:<br/>Activated T<br/>helper</b>    | <b>WT</b>    | Interaction<br>Sex<br>MS | F(1, 32)=1.75<br>F(1, 32)=1.51<br>F(1, 32)=7.80   | 0.1959<br>0.2287<br>0.0087** | Non-MS F vs. MS F        | 0.7094         |
|                                                |              |                          |                                                   |                              | <b>Non-MS M vs. MS M</b> | <b>0.0379*</b> |
|                                                |              |                          |                                                   |                              | Non-MS F vs. Non-MS M    | 0.2947         |
|                                                |              |                          |                                                   |                              | MS F vs. MS M            | 0.9999         |
|                                                | <b>5xFAD</b> | Interaction<br>Sex<br>MS | F(1, 28)=0.0238<br>F(1, 28)=1.42<br>F(1, 28)=0.24 | 0.8785<br>0.2441<br>0.6277   | Non-MS F vs. MS F        | 0.9508         |
|                                                |              |                          |                                                   |                              | Non-MS M vs. MS M        | 0.9966         |
|                                                |              |                          |                                                   |                              | Non-MS F vs. Non-MS M    | 0.8654         |
|                                                |              |                          |                                                   |                              | MS F vs. MS M            | 0.8028         |
| <b>4 months:<br/>Activated T<br/>cytotoxic</b> | <b>WT</b>    | Interaction<br>Sex<br>MS | F(1, 32)=2.02<br>F(1, 32)=0.0467<br>F(1, 32)=4.02 | 0.1650<br>0.8302<br>0.0536   | Non-MS F vs. MS F        | 0.9739         |
|                                                |              |                          |                                                   |                              | Non-MS M vs. MS M        | 0.1064         |
|                                                |              |                          |                                                   |                              | Non-MS F vs. Non-MS M    | 0.8305         |
|                                                |              |                          |                                                   |                              | MS F vs. MS M            | 0.6551         |
|                                                | <b>5xFAD</b> | Interaction<br>Sex<br>MS | F(1, 28)=2.34<br>F(1, 28)=0.398<br>F(1, 28)=0.835 | 0.1370<br>0.5332<br>0.3687   | Non-MS F vs. MS F        | 0.9564         |
|                                                |              |                          |                                                   |                              | Non-MS M vs. MS M        | 0.4293         |
|                                                |              |                          |                                                   |                              | Non-MS F vs. Non-MS M    | 0.9065         |
|                                                |              |                          |                                                   |                              | MS F vs. MS M            | 0.4777         |

12

13



14 **Supplementary Table 5:** Statistical analysis for figure Supplementary 1.

| Experiment                            | Groups | 2-way ANOVA |                |                  | Tukey's multiple comparisons test |               |
|---------------------------------------|--------|-------------|----------------|------------------|-----------------------------------|---------------|
|                                       |        | Factor      | F (DFn, DFd)   | P Value          | Comparisons                       | P Value       |
| 4 months:<br>Iba1<br>Dentate<br>Gyrus | WT     | Interaction | F(1,24)=0.315  | 0.5800           | Non-MS F vs. MS F                 | 0.9977        |
|                                       |        | Sex         | F(1,24)=1.140  | 0.2965           | Non-MS M vs. MS M                 | 0.8048        |
|                                       |        | MS          | F(1,24)=0.646  | 0.4296           | Non-MS F vs. Non-MS M             | 0.6469        |
|                                       |        |             |                |                  | MS F vs. MS M                     | 0.9848        |
|                                       | 5xFAD  | Interaction | F(1,22)=0.868  | 0.3617           | Non-MS F vs. MS F                 | 0.9557        |
|                                       |        | Sex         | F(1,22)=2.22   | 0.1501           | Non-MS M vs. MS M                 | 0.8366        |
|                                       |        | MS          | F(1,22)=0.0241 | 0.8780           | Non-MS F vs. Non-MS M             | 0.9807        |
|                                       |        |             |                |                  | MS F vs. MS M                     | 0.3060        |
| 4 months:<br>Iba1 CA1                 | WT     | Interaction | F(1,24)=0.849  | 0.3660           | Non-MS F vs. MS F                 | 0.9360        |
|                                       |        | Sex         | F(1,24)=0.934  | 0.3433           | Non-MS M vs. MS M                 | 0.8909        |
|                                       |        | MS          | F(1,24)=0.025  | 0.8744           | Non-MS F vs. Non-MS M             | 0.5328        |
|                                       |        |             |                |                  | MS F vs. MS M                     | >0.999        |
|                                       | 5xFAD  | Interaction | F(1,22)=0.775  | 0.3882           | Non-MS F vs. MS F                 | 0.7631        |
|                                       |        | Sex         | F(1,22)=2.560  | 0.1241           | Non-MS M vs. MS M                 | 0.9966        |
|                                       |        | MS          | F(1,22)=0.368  | 0.5501           | Non-MS F vs. Non-MS M             | 0.9608        |
|                                       |        |             |                |                  | MS F vs. MS M                     | 0.2873        |
| 4 months:<br>Iba1 CA3                 | WT     | Interaction | F(1,23)=1.78   | 0.1950           | Non-MS F vs. MS F                 | 0.9610        |
|                                       |        | Sex         | F(1,23)=0.078  | 0.7826           | Non-MS M vs. MS M                 | 0.5378        |
|                                       |        | MS          | F(1,23)=0.465  | 0.5021           | Non-MS F vs. Non-MS M             | 0.6675        |
|                                       |        |             |                |                  | MS F vs. MS M                     | 0.8776        |
|                                       | 5xFAD  | Interaction | F(1,22)=0.274  | 0.6061           | Non-MS F vs. MS F                 | 0.9294        |
|                                       |        | Sex         | F(1,22)=1.270  | 0.2716           | Non-MS M vs. MS M                 | 0.9997        |
|                                       |        | MS          | F(1,22)=0.157  | 0.6953           | Non-MS F vs. Non-MS M             | 0.9759        |
|                                       |        |             |                |                  | MS F vs. MS M                     | 0.6227        |
| 4 months:<br>Iba1<br>Amygdala         | WT     | Interaction | F(1,21)=1.560  | 0.2252           | Non-MS F vs. MS F                 | 0.9659        |
|                                       |        | Sex         | F(1,21)=0.307  | 0.5856           | Non-MS M vs. MS M                 | 0.5906        |
|                                       |        | MS          | F(1,21)=0.384  | 0.5419           | Non-MS F vs. Non-MS M             | 0.9642        |
|                                       |        |             |                |                  | MS F vs. MS M                     | 0.5544        |
|                                       | 5xFAD  | Interaction | F(1,24)=1.53   | 0.2281           | Non-MS F vs. MS F                 | 0.8512        |
|                                       |        | Sex         | F(1,24)=0.35   | 0.5595           | Non-MS M vs. MS M                 | 0.7662        |
|                                       |        | MS          | F(1,24)=0.0004 | 0.9845           | Non-MS F vs. Non-MS M             | 0.9710        |
|                                       |        |             |                |                  | MS F vs. MS M                     | 0.5433        |
| 4 months:<br>Congo Red<br>HP          | 5xFAD  | Interaction | F(1,25)=0.627  | 0.4359           | Non-MS F vs. MS F                 | 0.9936        |
|                                       |        | Sex         | F(1,25)=17.6   | <b>0.0003***</b> | Non-MS M vs. MS M                 | 0.8083        |
|                                       |        | MS          | F(1,25)=0.162  | 0.6906           | Non-MS F vs. Non-MS M             | 0.0913        |
|                                       |        |             |                |                  | <b>MS F vs. MS M</b>              | <b>0.0100</b> |
| 4 months:<br>Congo Red<br>Amygdala    | 5xFAD  | Interaction | F(1,22)=1.54   | 0.2283           | Non-MS F vs. MS F                 | 0.9714        |
|                                       |        | Sex         | F(1,22)=3.87   | 0.0620           | Non-MS M vs. MS M                 | 0.5402        |
|                                       |        | MS          | F(1,22)=0.356  | 0.5570           | Non-MS F vs. Non-MS M             | 0.9533        |

|  |  |  |  |  |               |        |
|--|--|--|--|--|---------------|--------|
|  |  |  |  |  | MS F vs. MS M | 0.1438 |
|--|--|--|--|--|---------------|--------|
