# Supplementary material for: Early-life stress elicits peripheral and brain immune activation differently in wild type and 5xFAD mice in a sex-specific manner
Source: Springer Nature journal article supplement (doi:10.1186/s12974-022-02515-w), 2022-06-15
Supplement: MOESM4 [file 23165290]

1 **Supplementary Table 1.1:** 3-way ANOVA analysis for figure 1.

| Experiment                                                                   | 3-way ANOVA      |                  |                 | Significant Tukey's multiple comparisons test |         |
|------------------------------------------------------------------------------|------------------|------------------|-----------------|-----------------------------------------------|---------|
|                                                                              | Factor           | F (DFn, DFd)     | P Value         | Comparisons                                   | P Value |
| <b>PD15: Iba1+ area (%) Hippocampus</b>                                      | 1: Sex           | 1: F(1,26)=3.026 | 1: 0.938        | WT F Non-MS vs. WT M MS                       | 0.004   |
|                                                                              | 2: Genotype      | 2: F(1,26)=3.738 | <b>2: 0.064</b> | 5xFAD F Non-MS vs. WT M MS                    | 0.033   |
|                                                                              | 3: MS            | 3: F(1,26)=9.807 | <b>3: 0.004</b> |                                               |         |
| 4: Sex x (genotype)                                                          | 4: F(1,26)=8.852 | <b>4: 0.006</b>  | 5: 0.147        | WT M MS vs. 5xFAD M Non-MS                    | 0.001   |
| 5: Sex x (MS)                                                                | 5: F(1,26)=2.232 | 6: 0.294         | 6: 0.294        |                                               |         |
| 6: Genotype x MS                                                             | 6: F(1,26)=1.144 | 7: 0.7571        | 7: 0.7571       |                                               |         |
| <b>PD15: Iba1+ area (%) Prefrontal Cortex</b>                                | 1: Sex           | 1: F(1,32)=5.080 | <b>1: 0.031</b> | -                                             |         |
| 2: Genotype                                                                  | 2: F(1,32)=0.302 | 2: 0.586         |                 |                                               |         |
| 3: MS                                                                        | 3: F(1,32)=0.233 | 3: 0.631         |                 |                                               |         |
| 4: Sex x (genotype)                                                          | 4: F(1,32)=0.009 | 4: 0.922         |                 |                                               |         |
| 5: Sex x (MS)                                                                | 5: F(1,32)=1.903 | 5: 0.177         |                 |                                               |         |
| 6: Genotype x MS                                                             | 6: F(1,32)=10.41 | 6: 0.526         |                 |                                               |         |
| 7: Sex x (Genotype) x (MS)                                                   | 7: F(1,32)=0.287 | 7: 0.595         |                 |                                               |         |
| <b>PD15: Microglia morphology Ramified (%) Hippocampus</b>                   | 1: Sex           | 1: F(1,26)=0.546 | 1: 0.466        | -                                             |         |
| 2: Genotype                                                                  | 2: F(1,26)=1.003 | 2: 0.325         |                 |                                               |         |
| 3: MS                                                                        | 3: F(1,26)=0.002 | 3: 0.964         |                 |                                               |         |
| 4: Sex x (genotype)                                                          | 4: F(1,26)=0.024 | 4: 0.876         |                 |                                               |         |
| 5: Sex x (MS)                                                                | 5: F(1,26)=0.079 | 5: 0.780         |                 |                                               |         |
| 6: Genotype x MS                                                             | 6: F(1,26)=0.540 | 6: 0.468         |                 |                                               |         |
| 7: Sex x (Genotype) x (MS)                                                   | 7: F(1,26)=0.118 | 7: 0.733         |                 |                                               |         |
| <b>PD15: Microglia morphology With stout processes (%) Hippocampus</b>       | 1: Sex           | 1: F(1,26)=0.335 | 1: 0.567        | -                                             |         |
| 2: Genotype                                                                  | 2: F(1,26)=0.120 | 2: 0.730         |                 |                                               |         |
| 3: MS                                                                        | 3: F(1,26)=1.892 | 3: 0.180         |                 |                                               |         |
| 4: Sex x (genotype)                                                          | 4: F(1,26)=0.430 | 4: 0.517         |                 |                                               |         |
| 5: Sex x (MS)                                                                | 5: F(1,26)=0.361 | 5: 0.553         |                 |                                               |         |
| 6: Genotype x MS                                                             | 6: F(1,26)=0.120 | 6: 0.731         |                 |                                               |         |
| 7: Sex x (Genotype) x (MS)                                                   | 7: F(1,26)=0.013 | 7: 0.909         |                 |                                               |         |
| <b>PD15: Microglia morphology Round/Ameboid (%) Hippocampus</b>              | 1: Sex           | 1: F(1,26)=0.640 | 1: 0.430        | -                                             |         |
| 2: Genotype                                                                  | 2: F(1,26)=0.691 | 2: 0.413         |                 |                                               |         |
| 3: MS                                                                        | 3: F(1,26)=0.680 | 3: 0.416         |                 |                                               |         |
| 4: Sex x (genotype)                                                          | 4: F(1,26)=0.078 | 4: 0.780         |                 |                                               |         |
| 5: Sex x (MS)                                                                | 5: F(1,26)=0.029 | 5: 0.867         |                 |                                               |         |
| 6: Genotype x MS                                                             | 6: F(1,26)=0.068 | 6: 0.795         |                 |                                               |         |
| 7: Sex x (Genotype) x (MS)                                                   | 7: F(1,26)=0.080 | 7: 0.779         |                 |                                               |         |
| <b>PD15: Microglia morphology: Ramified (%) Prefrontal Cortex</b>            | 1: Sex           | 1: F(1,32)=0.547 | 1: 0.464        | -                                             |         |
| 2: Genotype                                                                  | 2: F(1,32)=1.758 | 2: 0.194         |                 |                                               |         |
| 3: MS                                                                        | 3: F(1,32)=1.911 | 3: 0.176         |                 |                                               |         |
| 4: Sex x (genotype)                                                          | 4: F(1,32)=3.555 | 4: 0.068         |                 |                                               |         |
| 5: Sex x (MS)                                                                | 5: F(1,32)=4.332 | <b>5: 0.045</b>  |                 |                                               |         |
| 6: Genotype x MS                                                             | 6: F(1,32)=0.296 | 6: 0.590         |                 |                                               |         |
| 7: Sex x (Genotype) x (MS)                                                   | 7: F(1,32)=0.201 | 7: 0.656         |                 |                                               |         |
| <b>PD15: Microglia morphology with stout processes (%) Prefrontal Cortex</b> | 1: Sex           | 1: F(1,32)=0.027 | 1: 0.868        | WT F Non-MS vs. WT F MS                       | 0.011   |
| 2: Genotype                                                                  | 2: F(1,32)=0.746 | 2: 0.394         |                 |                                               |         |
| 3: MS                                                                        | 3: F(1,32)=1.642 | 3: 0.209         |                 |                                               |         |
| 4: Sex x (genotype)                                                          | 4: F(1,32)=1.225 | 4: 0.276         |                 |                                               |         |
| 5: Sex x (MS)                                                                | 5: F(1,32)=1.681 | 5: 0.204         |                 |                                               |         |
| 6: Genotype x MS                                                             | 6: F(1,32)=4.561 | <b>6: 0.040</b>  |                 |                                               |         |
| 7: Sex x (Genotype) x (MS)                                                   | 7: F(1,32)=8.837 | <b>7: 0.005</b>  |                 |                                               |         |
| <b>PD15: Microglia morphology:</b>                                           | 1: Sex           | 1: F(1,32)=0.103 | 1: 0.749        | WT F Non-MS vs. WT F MS                       | 0.046   |
| 2: Genotype                                                                  | 2: F(1,32)=2.339 | 2: 0.136         |                 |                                               |         |
| 3: MS                                                                        | 3: F(1,32)=0.010 | 3: 0.919         |                 |                                               |         |

|                                                  |                                                                                                                          |                                                                                                                                          |                                                                                         |   |  |
|--------------------------------------------------|--------------------------------------------------------------------------------------------------------------------------|------------------------------------------------------------------------------------------------------------------------------------------|-----------------------------------------------------------------------------------------|---|--|
| <b>Round/Ameboid (%) Prefrontal Cortex</b>       | 4: Sex x (genotype)<br>5: Sex x (MS)<br>6: Genotype x MS<br>7: Sex x (Genotype) x (MS)                                   | 4: F(1,32)=0.251<br>5: F(1,32)=5.706<br>6: F(1,32)=3.918<br>7: F(1,32)=4.262                                                             | 4: 0.619<br><b>5: 0.023</b><br>6: 0.056<br><b>7: 0.047</b>                              |   |  |
| <b>PD15: CXCL1 Hippocampus</b>                   | 1: Sex<br>2: Genotype<br>3: MS<br>4: Sex x (genotype)<br>5: Sex x (MS)<br>6: Genotype x MS<br>7: Sex x (Genotype) x (MS) | 1: F(1,32)=1.823<br>2: F(1,32)=0.222<br>3: F(1,32)=0.815<br>4: F(1,32)=5.697<br>5: F(1,32)=1.116<br>6: F(1,32)=0.358<br>7: F(1,32)=0.358 | 1: 0.186<br>2: 0.640<br>3: 0.373<br><b>4: 0.023</b><br>5: 0.298<br>6: 0.553<br>7: 0.553 | - |  |
| <b>PD15: TNF-<math>\alpha</math> Hippocampus</b> | 1: Sex<br>2: Genotype<br>3: MS<br>4: Sex x (genotype)<br>5: Sex x (MS)<br>6: Genotype x MS<br>7: Sex x (Genotype) x (MS) | 1: F(1,32)=4.890<br>2: F(1,32)=2.138<br>3: F(1,32)=0.007<br>4: F(1,32)=1.623<br>5: F(1,32)=2.741<br>6: F(1,32)=0.036<br>7: F(1,32)=2.600 | <b>1: 0.034</b><br>2: 0.153<br>3: 0.931<br>4: 0.211<br>5: 0.107<br>6: 0.849<br>7: 0.116 | - |  |

2

3

4 **Supplementary Table 2.1:** 3-way ANOVA analysis for figure 2.

5

6

| Experiment                                            | 3-way ANOVA                                                                                                              |                                                                                                                                                         |                                                                                                     | Significant Tukey's multiple comparisons test |         |
|-------------------------------------------------------|--------------------------------------------------------------------------------------------------------------------------|---------------------------------------------------------------------------------------------------------------------------------------------------------|-----------------------------------------------------------------------------------------------------|-----------------------------------------------|---------|
|                                                       | Factor                                                                                                                   | F (DFn, DFd)                                                                                                                                            | P Value                                                                                             | Comparisons                                   | P Value |
| <b>4 months: Open Field Test</b>                      | 1: Sex<br>2: Genotype<br>3: MS<br>4: Sex x (genotype)<br>5: Sex x (MS)<br>6: Genotype x MS<br>7: Sex x (Genotype) x (MS) | 1: F(1,63)=4.783<br>2: F(1,63)=1.324<br>3: F(1,63)=2.393<br>4: F(1,63)=2.090<br>5: F(1,63)=1.976<br>6: F(1,63)=1.770<br>7: F(1,63)=1.063                | <b>1: 0.032</b><br>2: 0.254<br>3: 0.126<br>4: 0.153<br>5: 0.164<br>6: 0.188<br>7: 0.306             | WT F Non-MS vs. WT M MS                       | 0.044   |
|                                                       |                                                                                                                          |                                                                                                                                                         |                                                                                                     | WT F Non-MS vs. 5Xfad M Non-MS                | 0.031   |
| <b>4 months: Forced Swim Test</b>                     | 1: Sex<br>2: Genotype<br>3: MS<br>4: Sex x (genotype)<br>5: Sex x (MS)<br>6: Genotype x MS<br>7: Sex x (Genotype) x (MS) | 1: F(1,58)=1.095<br>2: F(1,58)=10.97<br>3: F(1,58)=28.97<br>4: F(1,58)=2.537<br>5: F(1,58)=0.010<br>6: F(1,58)=0.959<br>7: F(1,58)=2.827                | 1: 0.299<br><b>2: 0.001</b><br><b>3: &lt;0.0001</b><br>4: 0.116<br>5: 0.920<br>6: 0.331<br>7: 0.098 | WT F MS vs. 5xFAD F Non-MS                    | 0.0002  |
|                                                       |                                                                                                                          |                                                                                                                                                         |                                                                                                     | WT F MS vs. WT M Non-MS                       | 0.004   |
|                                                       |                                                                                                                          |                                                                                                                                                         |                                                                                                     | WT F MS vs. 5xFAD M Non-MS                    | 0.003   |
|                                                       |                                                                                                                          |                                                                                                                                                         |                                                                                                     | 5xFAD F vs. WT M MS                           | 0.0002  |
|                                                       |                                                                                                                          |                                                                                                                                                         |                                                                                                     | WT M Non-MS vs. WT M MS                       | 0.007   |
|                                                       |                                                                                                                          |                                                                                                                                                         |                                                                                                     | WT M MS vs. 5xFAD M Non-MS                    | 0.004   |
| <b>4 months: Novel Object Recognition Memory Test</b> | 1: Sex<br>2: Genotype<br>3: MS<br>4: Sex x (genotype)<br>5: Sex x (MS)<br>6: Genotype x MS<br>7: Sex x (Genotype) x (MS) | 1: F(1,39)=3.980<br>2: F(1,39)=8.221<br>3: F(1,39)=29.44<br>4: F(1,39)=1.990<br>5: F(1,39)=0.002<br>6: F(1,39)=0.044<br>7: F(1,39)=7.6*10 <sup>-8</sup> | 1: 0.053<br><b>2: 0.006</b><br><b>3: &lt;0.0001</b><br>4: 0.166<br>5: 0.961<br>6: 0.834<br>7: 0.999 | WT F Non-MS vs. 5xFAD F MS                    | 0.027   |
|                                                       |                                                                                                                          |                                                                                                                                                         |                                                                                                     | WT F Non-MS vs. 5xFAD M MS                    | <0.0001 |
|                                                       |                                                                                                                          |                                                                                                                                                         |                                                                                                     | 5xFAD F Non-MS vs. 5xFAD M MS                 | 0.0006  |
|                                                       |                                                                                                                          |                                                                                                                                                         |                                                                                                     | WT M Non-MS vs. 5xFAD M MS                    | 0.0004  |
| <b>4 months: HP gene expression Bdnf</b>              | 1: Sex<br>2: Genotype<br>3: MS<br>4: Sex x (genotype)<br>5: Sex x (MS)<br>6: Genotype x MS<br>7: Sex x (Genotype) x (MS) | 1: F(1,37)=1.200<br>2: F(1,37)=0.384<br>3: F(1,37)=18.10<br>4: F(1,37)=0.491<br>5: F(1,37)=4.147<br>6: F(1,37)=0.197<br>7: F(1,37)=0.081                | 1: 0.280<br>2: 0.539<br><b>3: 0.0001</b><br>4: 0.487<br><b>5: 0.048</b><br>6: 0.659<br>7: 0.776     | WT F MS vs. WT M Non-MS                       | 0.033   |
|                                                       |                                                                                                                          |                                                                                                                                                         |                                                                                                     | WT M Non-MS vs. 5xFAD M MS                    | 0.004   |
| <b>4 months: HP gene expression Arc</b>               | 1: Sex<br>2: Genotype<br>3: MS<br>4: Sex x (genotype)<br>5: Sex x (MS)<br>6: Genotype x MS<br>7: Sex x (Genotype) x (MS) | 1: F(1,40)=0.008<br>2: F(1,40)=1.063<br>3: F(1,40)=0.483<br>4: F(1,40)=0.186<br>5: F(1,40)=1.753<br>6: F(1,40)=0.017<br>7: F(1,40)=10.32                | 1: 0.927<br>2: 0.308<br>3: 0.490<br>4: 0.668<br>5: 0.193<br>6: 0.894<br><b>7: 0.002</b>             | -                                             |         |

7 **Supplementary Table 3.1:** 3-way ANOVA analysis for figure 3.

| Experiment                                                    | 3-way ANOVA                                                                                                              |                                                                                                                                          |                                                                                                                   | Significant Tukey's multiple comparisons test |         |
|---------------------------------------------------------------|--------------------------------------------------------------------------------------------------------------------------|------------------------------------------------------------------------------------------------------------------------------------------|-------------------------------------------------------------------------------------------------------------------|-----------------------------------------------|---------|
|                                                               | Factor                                                                                                                   | F (DFn, DFd)                                                                                                                             | P Value                                                                                                           | Comparisons                                   | P Value |
| <b>4 months:<br/>Iba1+ area<br/>(%) Prefrontal<br/>Cortex</b> | 1: Sex<br>2: Genotype<br>3: MS<br>4: Sex x (genotype)<br>5: Sex x (MS)<br>6: Genotype x MS<br>7: Sex x (Genotype) x (MS) | 1: F(1,43)=3.143<br>2: F(1,43)=81.78<br>3: F(1,43)=4.368<br>4: F(1,43)=5.522<br>5: F(1,43)=3.873<br>6: F(1,43)=0.244<br>7: F(1,43)=6.031 | 1: 0.083<br><b>2: &lt;0.0001</b><br><b>3: 0.042</b><br><b>4: 0.023</b><br>5: 0.055<br>6: 0.623<br><b>7: 0.018</b> | WT F Non-MS vs. 5xFAD F Non-MS                | 0.0067  |
|                                                               |                                                                                                                          |                                                                                                                                          |                                                                                                                   | WT F Non-MS vs. 5xFAD F MS                    | <0.0001 |
|                                                               |                                                                                                                          |                                                                                                                                          |                                                                                                                   | WT F Non-MS vs. 5xFAD M Non-MS                | 0.003   |
|                                                               |                                                                                                                          |                                                                                                                                          |                                                                                                                   | WT F Non-MS vs. 5xFAD M MS                    | 0.035   |
|                                                               |                                                                                                                          |                                                                                                                                          |                                                                                                                   | WT F MS vs. 5xFAD Non-MS F                    | 0.012   |
|                                                               |                                                                                                                          |                                                                                                                                          |                                                                                                                   | WT F MS vs. 5xFAD F MS                        | <0.0001 |
|                                                               |                                                                                                                          |                                                                                                                                          |                                                                                                                   | WT F MS vs. 5xFAD M Non-MS                    | 0.005   |
|                                                               |                                                                                                                          |                                                                                                                                          |                                                                                                                   | 5xFAD F Non-MS vs. 5xFAD F MS                 | 0.027   |
|                                                               |                                                                                                                          |                                                                                                                                          |                                                                                                                   | 5xFAD F Non-MS vs. WT M Non-MS                | 0.002   |
|                                                               |                                                                                                                          |                                                                                                                                          |                                                                                                                   | 5xFAD F MS vs. WT M Non-MS                    | <0.0001 |
|                                                               |                                                                                                                          |                                                                                                                                          |                                                                                                                   | 5xFAD F MS vs. WT M MS                        | <0.0001 |
|                                                               |                                                                                                                          |                                                                                                                                          |                                                                                                                   | 5xFAD F MS vs. 5xFAD M Non-MS                 | 0.029   |
|                                                               |                                                                                                                          |                                                                                                                                          |                                                                                                                   | 5xFAD F MS vs. 5xFAD M MS                     | 0.002   |
|                                                               |                                                                                                                          |                                                                                                                                          |                                                                                                                   | WT M Non-MS vs. 5xFAD M Non-MS                | 0.001   |
|                                                               |                                                                                                                          |                                                                                                                                          |                                                                                                                   | WT M Non-MS vs. 5xFAD M MS                    | 0.017   |
|                                                               |                                                                                                                          |                                                                                                                                          |                                                                                                                   | WT M MS vs. 5xFAD M Non-MS                    | 0.034   |

|                                                                                             |                                                                                                                          |                                                                                                                                          |                                                                                                            |                                |        |
|---------------------------------------------------------------------------------------------|--------------------------------------------------------------------------------------------------------------------------|------------------------------------------------------------------------------------------------------------------------------------------|------------------------------------------------------------------------------------------------------------|--------------------------------|--------|
| <b>4 months:<br/>CD68+ area<br/>related to<br/>Iba1+ area<br/>(%) Prefrontal<br/>Cortex</b> | 1: Sex<br>2: Genotype<br>3: MS<br>4: Sex x (genotype)<br>5: Sex x (MS)<br>6: Genotype x MS<br>7: Sex x (Genotype) x (MS) | 1: F(1,31)=4.591<br>2: F(1,31)=31.58<br>3: F(1,31)=0.230<br>4: F(1,31)=0.879<br>5: F(1,31)=1.467<br>6: F(1,31)=4.372<br>7: F(1,31)=2.890 | <b>1: 0.040</b><br><b>2: &lt;0.0001</b><br>3: 0.634<br>4: 0.355<br>5: 0.235<br><b>6: 0.044</b><br>7: 0.099 | WT F Non-MS vs. 5xFAD F Non-MS | 0.025  |
|                                                                                             |                                                                                                                          |                                                                                                                                          |                                                                                                            | WT F Non-MS vs. 5xFAD F MS     | 0.004  |
|                                                                                             |                                                                                                                          |                                                                                                                                          |                                                                                                            | WT F Non-MS vs. 5xFAD M Non-MS | 0.031  |
|                                                                                             |                                                                                                                          |                                                                                                                                          |                                                                                                            | 5xFAD F Non-MS vs. WT M Non-MS | 0.002  |
|                                                                                             |                                                                                                                          |                                                                                                                                          |                                                                                                            | 5xFAD F MS vs. WT M Non-MS     | 0.0004 |
|                                                                                             |                                                                                                                          |                                                                                                                                          |                                                                                                            | 5xFAD F MS vs. WT M MS         | 0.044  |
|                                                                                             |                                                                                                                          |                                                                                                                                          |                                                                                                            | WT M Non-MS vs. 5xFAD M Non-MS | 0.003  |

8

9

10 **Supplementary Table 4.1:** 3-way ANOVA analysis for figure 4.

| Experiment                                      | 3-way ANOVA                                                                                                              |                                                                                                                                          |                                                                                                       | Significant Tukey's multiple comparisons test |         |
|-------------------------------------------------|--------------------------------------------------------------------------------------------------------------------------|------------------------------------------------------------------------------------------------------------------------------------------|-------------------------------------------------------------------------------------------------------|-----------------------------------------------|---------|
|                                                 | Factor                                                                                                                   | F (DFn, DFd)                                                                                                                             | P Value                                                                                               | Comparisons                                   | P Value |
| <b>4 months:<br/>Inflammatory<br/>Monocytes</b> | 1: Sex<br>2: Genotype<br>3: MS<br>4: Sex x (genotype)<br>5: Sex x (MS)<br>6: Genotype x MS<br>7: Sex x (Genotype) x (MS) | 1: F(1,60)=9.208<br>2: F(1,60)=0.376<br>3: F(1,60)=22.07<br>4: F(1,60)=3.128<br>5: F(1,60)=1.091<br>6: F(1,60)=0.069<br>7: F(1,60)=1.481 | <b>1: 0.003</b><br>2: 0.541<br><b>3: &lt;0.0001</b><br>4: 0.082<br>5: 0.300<br>6: 0.792<br>7: 0.228   | WT F Non-MS vs. 5xFAD M MS                    | 0.001   |
|                                                 |                                                                                                                          |                                                                                                                                          |                                                                                                       | 5xFAD F Non-MS vs. WT M MS                    | 0.043   |
|                                                 |                                                                                                                          |                                                                                                                                          |                                                                                                       | 5xFAD F Non-MS vs. 5xFAD M MS                 | 0.001   |
|                                                 |                                                                                                                          |                                                                                                                                          |                                                                                                       | 5xFAD F MS vs. 5xFAD M MS                     | 0.041   |
|                                                 |                                                                                                                          |                                                                                                                                          |                                                                                                       | WT M Non-MS vs. 5xFAD M MS                    | 0.016   |
| <b>4 months:<br/>Cytotoxic T<br/>Cells</b>      | 1: Sex<br>2: Genotype<br>3: MS<br>4: Sex x (genotype)<br>5: Sex x (MS)<br>6: Genotype x MS<br>7: Sex x (Genotype) x (MS) | 1: F(1,60)=9.820<br>2: F(1,60)=3.152<br>3: F(1,60)=20.54<br>4: F(1,60)=0.189<br>5: F(1,60)=0.956<br>6: F(1,60)=2.551<br>7: F(1,60)=1.176 | <b>1: 0.002</b><br>2: 0.080<br><b>3: &lt;0.0001</b><br>4: 0.665<br>5: 0.332<br>6: 0.115<br>7: 0.282   | WT F Non-MS vs. 5xFAD M MS                    | 0.046   |
|                                                 |                                                                                                                          |                                                                                                                                          |                                                                                                       | WT F MS vs. 5xFAD F Non-MS                    | 0.002   |
|                                                 |                                                                                                                          |                                                                                                                                          |                                                                                                       | 5xFAD F Non-MS vs. 5xFAD F MS                 | 0.028   |
|                                                 |                                                                                                                          |                                                                                                                                          |                                                                                                       | 5xFAD F Non-MS vs. WT M Non-MS                | 0.005   |
|                                                 |                                                                                                                          |                                                                                                                                          |                                                                                                       | 5xFAD F Non-MS vs. WT M MS                    | 0.0007  |
|                                                 |                                                                                                                          |                                                                                                                                          |                                                                                                       | 5xFAD F Non-MS vs. 5xFAD M MS                 | 0.001   |
| <b>4 months:<br/>Dendritic Cells</b>            | 1: Sex<br>2: Genotype<br>3: MS<br>4: Sex x (genotype)<br>5: Sex x (MS)<br>6: Genotype x MS<br>7: Sex x (Genotype) x (MS) | 1: F(1,60)=4.610<br>2: F(1,60)=8.868<br>3: F(1,60)=4.649<br>4: F(1,60)=0.122<br>5: F(1,60)=0.022<br>6: F(1,60)=0.015<br>7: F(1,60)=2.370 | <b>1: 0.035</b><br><b>2: 0.004</b><br><b>3: 0.035</b><br>4: 0.728<br>5: 0.880<br>6: 0.902<br>7: 0.128 | -                                             |         |
| <b>4 months:<br/>Eosinophils</b>                | 1: Sex<br>2: Genotype<br>3: MS<br>4: Sex x (genotype)<br>5: Sex x (MS)<br>6: Genotype x MS<br>7: Sex x (Genotype) x (MS) | 1: F(1,60)=5.729<br>2: F(1,60)=0.771<br>3: F(1,60)=7.144<br>4: F(1,60)=1.684<br>5: F(1,60)=0.672<br>6: F(1,60)=1.134<br>7: F(1,60)=0.020 | <b>1: 0.019</b><br>2: 0.383<br><b>3: 0.009</b><br>4: 0.199<br>5: 0.415<br>6: 0.291<br>7: 0.887        | -                                             |         |
| <b>4 months:<br/>Neutrophils</b>                | 1: Sex<br>2: Genotype<br>3: MS<br>4: Sex x (genotype)<br>5: Sex x (MS)<br>6: Genotype x MS                               | 1: F(1,60)=14.56<br>2: F(1,60)=1.769<br>3: F(1,60)=3.980<br>4: F(1,60)=0.005<br>5: F(1,60)=0.021<br>6: F(1,60)=1.730                     | <b>1: 0.0003</b><br>2: 0.188<br>3: 0.050<br>4: 0.942<br>5: 0.883<br>6: 0.193                          | WT F Non-MS vs. 5xFAD M MS                    | 0.005   |
|                                                 |                                                                                                                          |                                                                                                                                          |                                                                                                       | 5xFAD F Non-MS vs. 5xFAD M MS                 | 0.042   |

|                                                |                                                                                                                          |                                                                                                                                                         |                                                                                                 |                                  |       |
|------------------------------------------------|--------------------------------------------------------------------------------------------------------------------------|---------------------------------------------------------------------------------------------------------------------------------------------------------|-------------------------------------------------------------------------------------------------|----------------------------------|-------|
|                                                | 7: Sex x (Genotype) x (MS)                                                                                               | 7: F(1,60)=2.349                                                                                                                                        | 7: 0.130                                                                                        |                                  |       |
| <b>4 months:<br/>Activated T<br/>helper</b>    | 1: Sex<br>2: Genotype<br>3: MS<br>4: Sex x (genotype)<br>5: Sex x (MS)<br>6: Genotype x MS<br>7: Sex x (Genotype) x (MS) | 1: F(1,60)=2.886<br>2: F(1,60)=14.17<br>3: F(1,60)=5.226<br>4: F(1,60)=8.1*10 <sup>-6</sup><br>5: F(1,60)=0.649<br>6: F(1,60)=2.519<br>7: F(1,60)=1.053 | 1: 0.094<br><b>2: 0.0004</b><br><b>3: 0.025</b><br>4: 0.997<br>5: 0.423<br>6: 0.117<br>7: 0.309 | WT F MS vs.<br>5xFAD M<br>Non-MS | 0.031 |
|                                                |                                                                                                                          |                                                                                                                                                         |                                                                                                 | WT M MS vs.<br>5xFAD M<br>Non-MS | 0.026 |
| <b>4 months:<br/>Activated T<br/>cytotoxic</b> | 1: Sex<br>2: Genotype<br>3: MS<br>4: Sex x (genotype)<br>5: Sex x (MS)<br>6: Genotype x MS<br>7: Sex x (Genotype) x (MS) | 1: F(1,60)=0.025<br>2: F(1,60)=2.263<br>3: F(1,60)=1.268<br>4: F(1,60)=0.257<br>5: F(1,60)=0.109<br>6: F(1,60)=4.381<br>7: F(1,60)=3.808                | 1: 0.873<br>2: 0.137<br>3: 0.264<br>4: 0.613<br>5: 0.741<br><b>6: 0.040</b><br>7: 0.055         | -                                |       |

11

12

13 **Supplementary Table 5.1:** 3-way ANOVA analysis for figure Supplementary 1.  
 14

| Experiment                          | 3-way ANOVA                |                  |                      | Significant Tukey's multiple comparisons test |         |
|-------------------------------------|----------------------------|------------------|----------------------|-----------------------------------------------|---------|
|                                     | Factor                     | F (DFn, DFd)     | P Value              | Comparisons                                   | P Value |
| <b>4 months: Iba1 Dentate Gyrus</b> | 1: Sex                     | 1: F(1,46)=3.326 | 1: 0.074             | WT F Non-MS vs. 5xFAD F MS                    | 0.049   |
|                                     | 2: Genotype                | 2: F(1,46)=20.29 | <b>2: &lt;0.0001</b> | WT F MS vs. 5xFAD F MS                        | 0.040   |
|                                     | 3: MS                      | 3: F(1,46)=0.021 | 3: 0.883             | 5xFAD F MS vs. WT M Non-MS                    | 0.009   |
| <b>4 months: Iba1 CA1</b>           | 4: Sex x (genotype)        | 4: F(1,46)=1.075 | 4: 0.305             | WT F Non-MS vs. 5xFAD F MS                    | 0.032   |
|                                     | 5: Sex x (MS)              | 5: F(1,46)=0.471 | 5: 0.495             | WT F MS vs. 5xFAD F MS                        | 0.007   |
|                                     | 6: Genotype x MS           | 6: F(1,46)=0.198 | 6: 0.658             | 5xFAD F MS vs. WT M Non-MS                    | 0.002   |
|                                     | 7: Sex x (Genotype) x (MS) | 7: F(1,46)=1.211 | 7: 0.276             | 5xFAD F MS vs. WT M MS                        | 0.027   |
|                                     | 1: Sex                     | 1: F(1,46)=3.621 | 1: 0.063             | -                                             | -       |
|                                     | 2: Genotype                | 2: F(1,46)=21.84 | <b>2: &lt;0.0001</b> | -                                             | -       |
|                                     | 3: MS                      | 3: F(1,46)=0.394 | 3: 0.533             | -                                             | -       |
| <b>4 months: Iba1 CA3</b>           | 4: Sex x (genotype)        | 4: F(1,46)=1.042 | 4: 0.312             | -                                             | -       |
|                                     | 5: Sex x (MS)              | 5: F(1,46)=0.147 | 5: 0.702             | -                                             | -       |
|                                     | 6: Genotype x MS           | 6: F(1,46)=0.232 | 6: 0.632             | -                                             | -       |
|                                     | 7: Sex x (Genotype) x (MS) | 7: F(1,46)=1.502 | 7: 0.226             | -                                             | -       |
|                                     | 1: Sex                     | 1: F(1,45)=1.348 | 1: 0.251             | -                                             | -       |
|                                     | 2: Genotype                | 2: F(1,45)=7.708 | <b>2: 0.008</b>      | -                                             | -       |
|                                     | 3: MS                      | 3: F(1,45)=0.406 | 3: 0.526             | -                                             | -       |
| <b>4 months: Iba1 Amygdala</b>      | 4: Sex x (genotype)        | 4: F(1,45)=0.887 | 4: 0.351             | -                                             | -       |
|                                     | 5: Sex x (MS)              | 5: F(1,45)=0.001 | 5: 0.971             | -                                             | -       |
|                                     | 6: Genotype x MS           | 6: F(1,45)=0.010 | 6: 0.979             | -                                             | -       |
|                                     | 7: Sex x (Genotype) x (MS) | 7: F(1,45)=1.024 | 7: 0.317             | -                                             | -       |
|                                     | 1: Sex                     | 1: F(1,45)=0.124 | 1: 0.725             | WT F MS vs. 5xFAD F MS                        | 0.019   |
|                                     | 2: Genotype                | 2: F(1,45)=20.74 | <b>2: &lt;0.0001</b> | WT F MS vs. 5xFAD M Non-MS                    | 0.047   |
|                                     | 3: MS                      | 3: F(1,45)=0.046 | 3: 0.829             | 5xFAD F MS vs. WT M Non-MS                    | 0.041   |
